# Supplementary material for: Leveraging the bio-enabled muconic acid platform via phospha-Michael-addition: intrinsically flame-retardant nylon-66/DOPO copolymers
Source: Royal Society of Chemistry journal article supplement (doi:10.1039/d4su00184b), 2024-01-01
Supplement: d4su00184b1.pdf [file d4su00184b1.pdf]

### Supporting Information

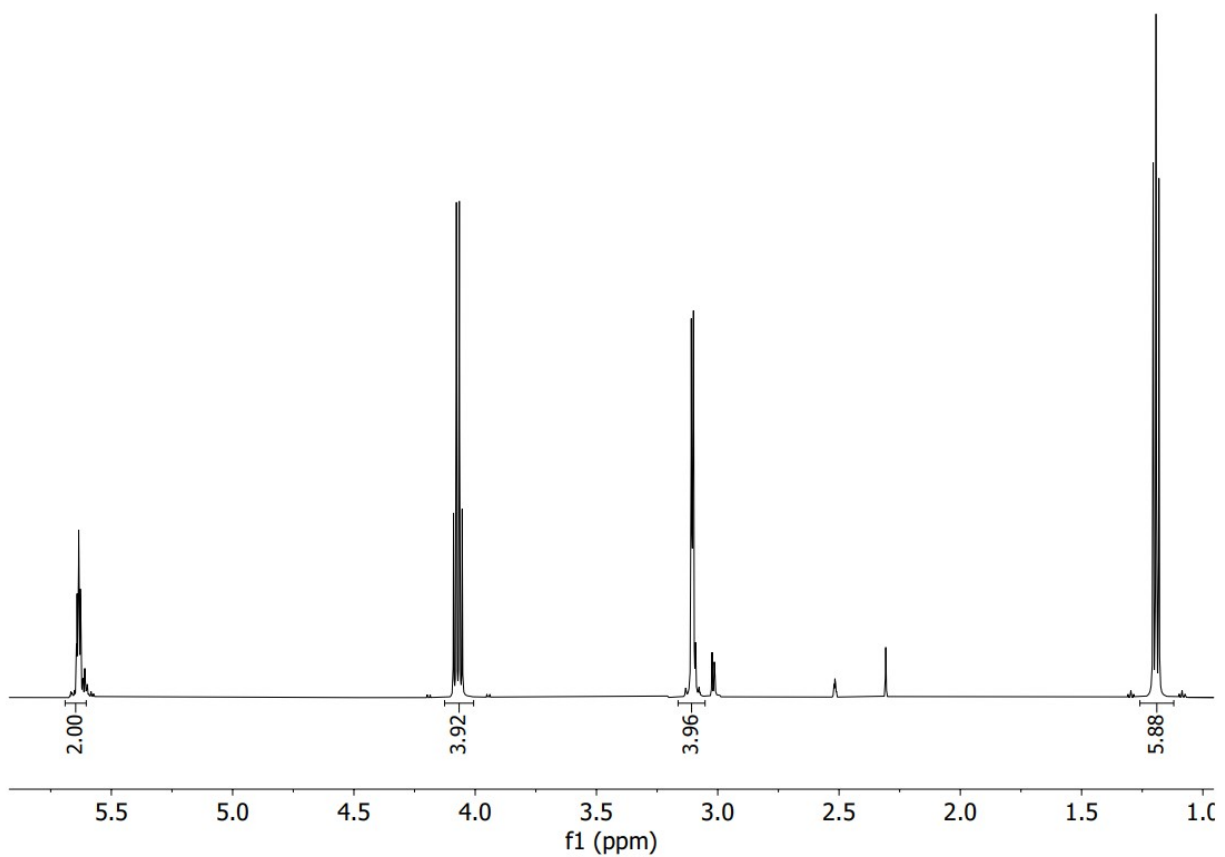

**Figure S1:** NMR of the HDA showing the isomerization from 3-HDA to 2-HDA.

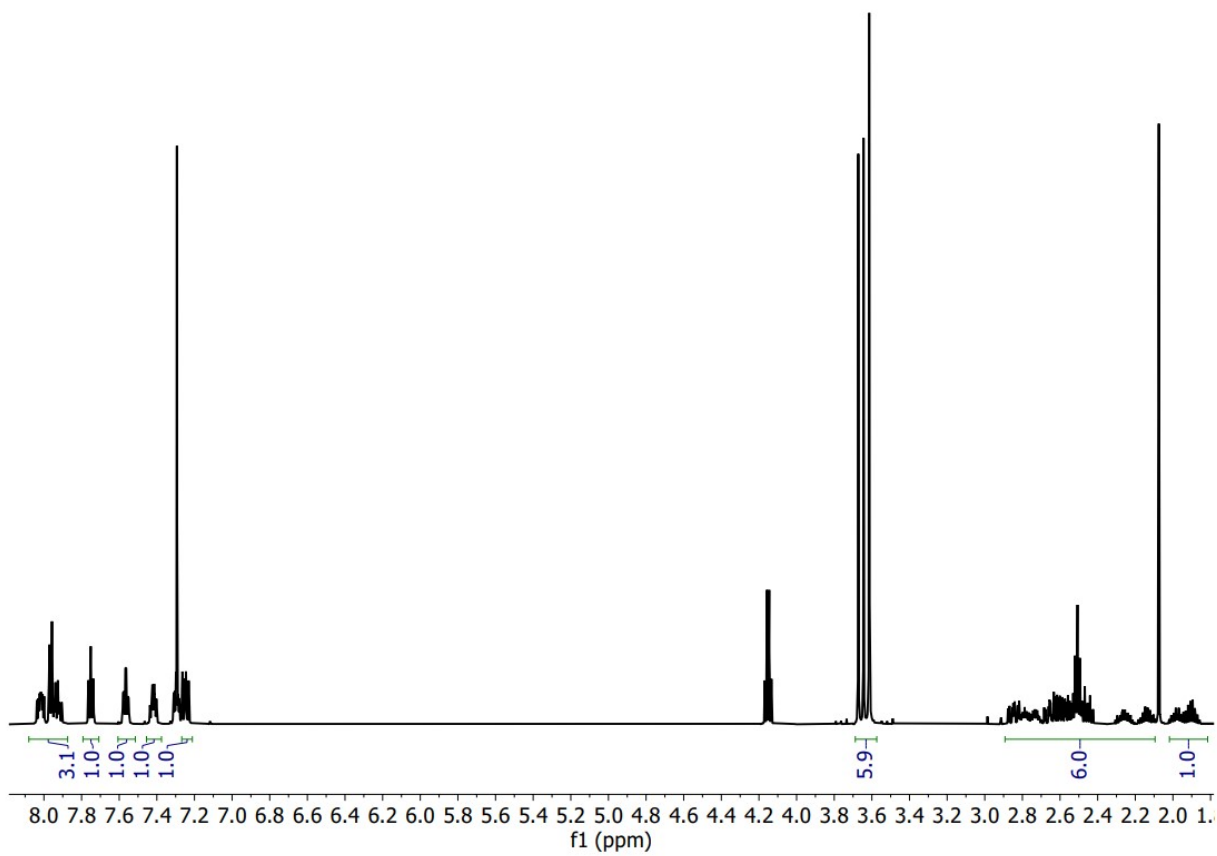

**Figure S2:** The full NMR of the DOPO-functionalized HDA. The peak at 4.2 is the hydrogen  $\alpha$  to the carbonyl. The lack of a peak in the rest of the 4-5 range demonstrates the DOPO molecule added to the  $\beta$  position.

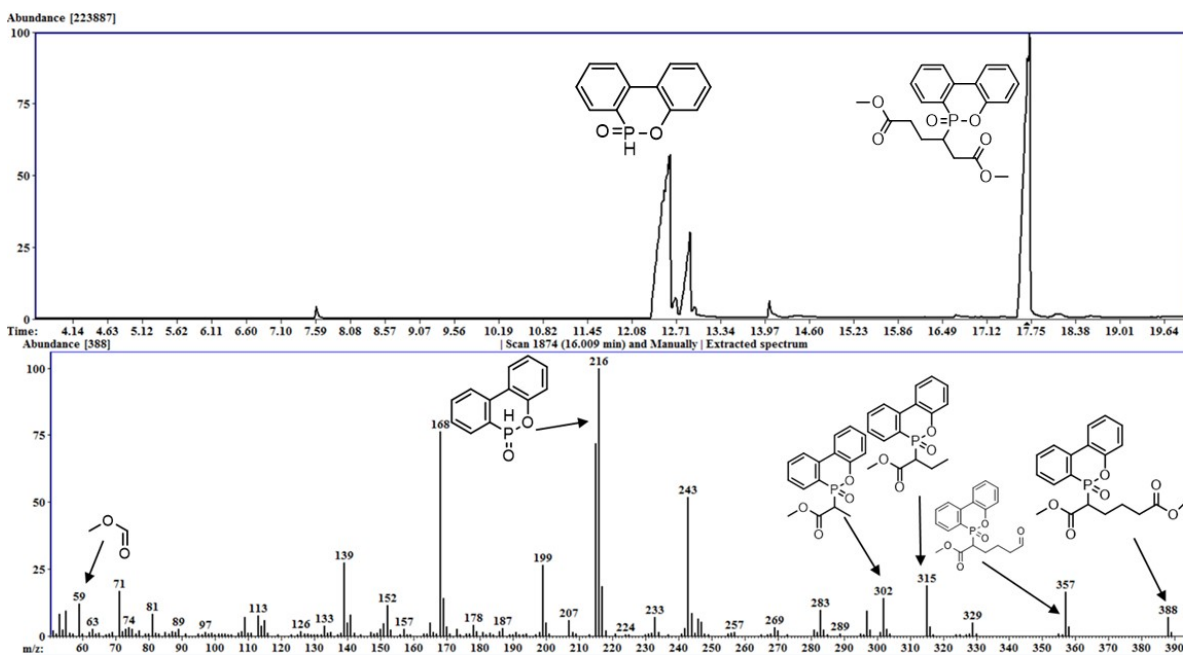

**Figure S3.** GC-MS for the one-pot isomerization and Michael-addition product after 96 hours of reaction time.

PCS175-5.1.fid  
DOPO:HMDA salt in D2O

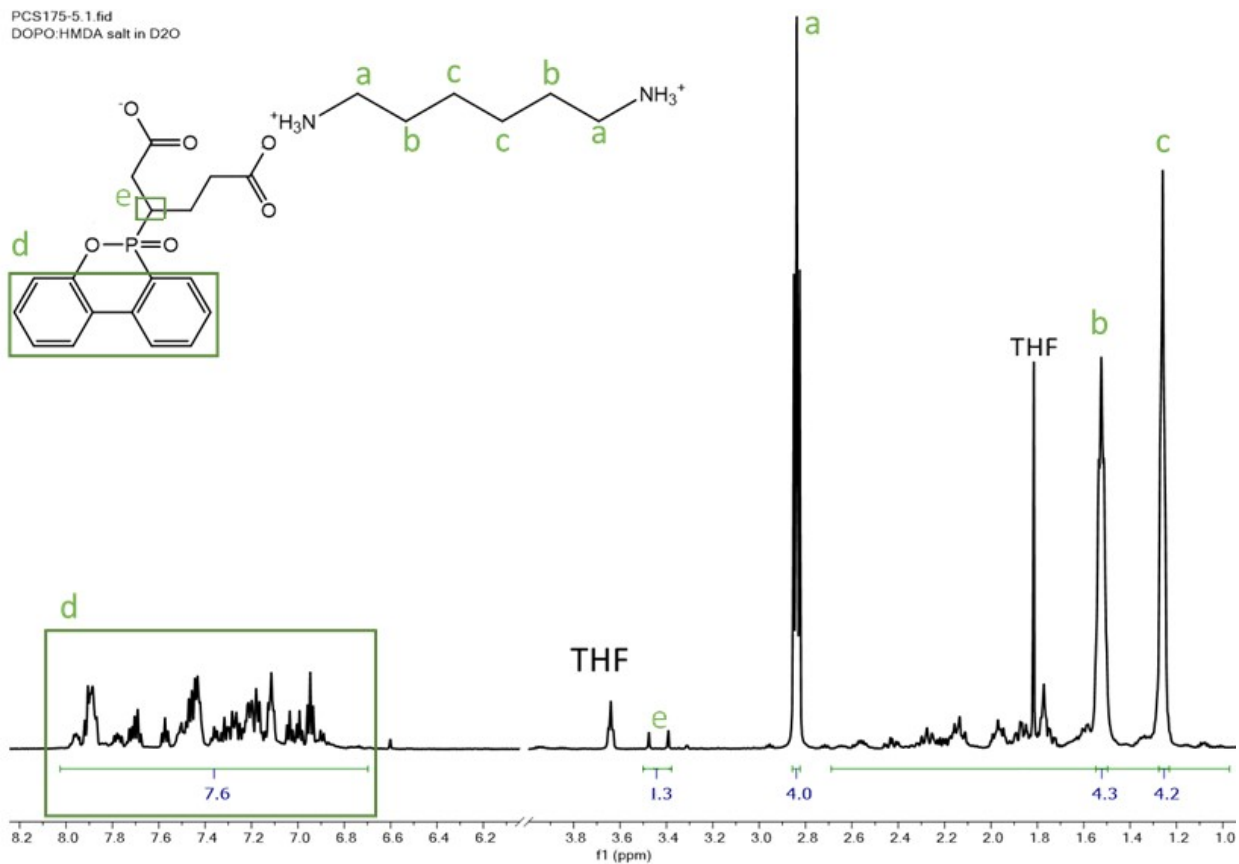

**Figure S4.** <sup>1</sup>H NMR of salt in D<sub>2</sub>O. The salt was prepared by precipitating the functionalized diacid with HMDA in THF.

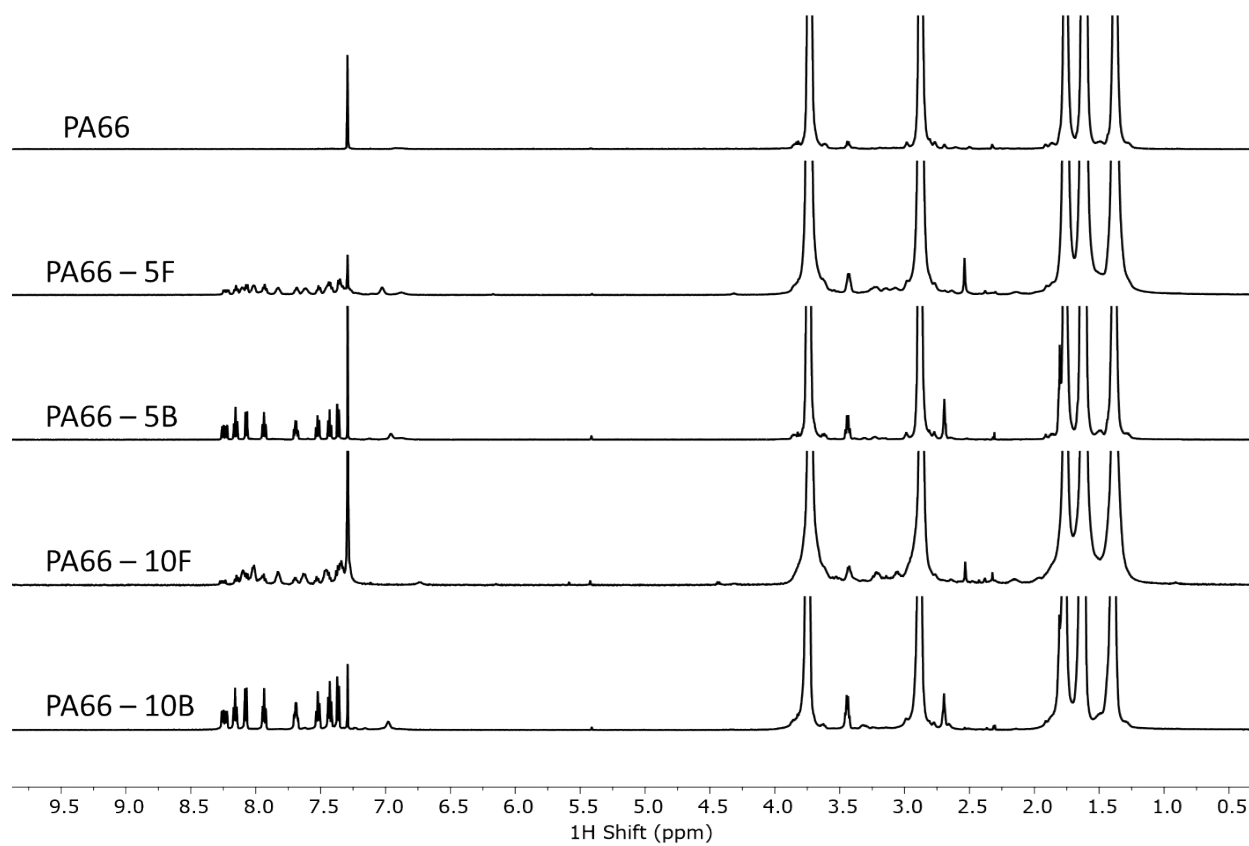

**Figure S5.** <sup>1</sup>H NMR of polymers shown in this study. Percent incorporation of DOPO was calculated through the integration of the aromatic region with respect to the HMDA peak at 3.7 ppm.

PA66-10B

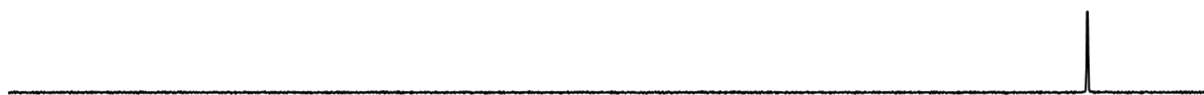

PA66-10F

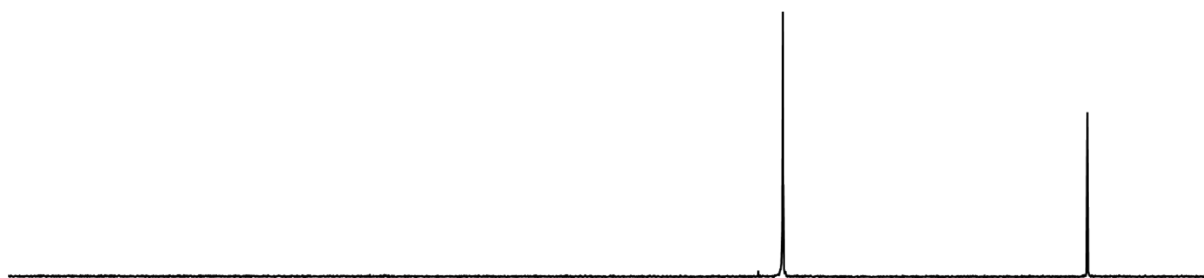

135 130 125 120 115 110 105 100 95 90 85 80 75 70 65 60 55 50 45 40 35 30 25 20 15 10 5 0 -5  
31P Shift (ppm)

**Figure S6.**  $^{31}\text{P}$ -NMR of polymers with 10 wt% DOPO incorporation.

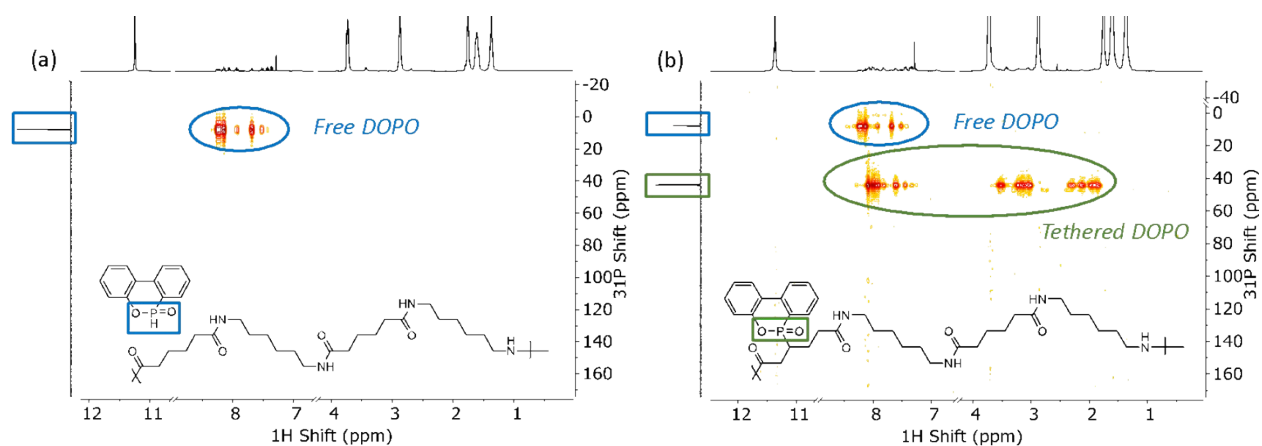

**Figure S7.** HMBC spectra of  $^{31}\text{P}$  versus  $^1\text{H}$  for (a) PA66-10B and (b) PA66-10F in  $\text{CDCl}_3$ . The appearance of cross peaks highlighted in green in (b) shows the majority (75%) of DOPO remains grafted onto the polymer backbone during polymerization.

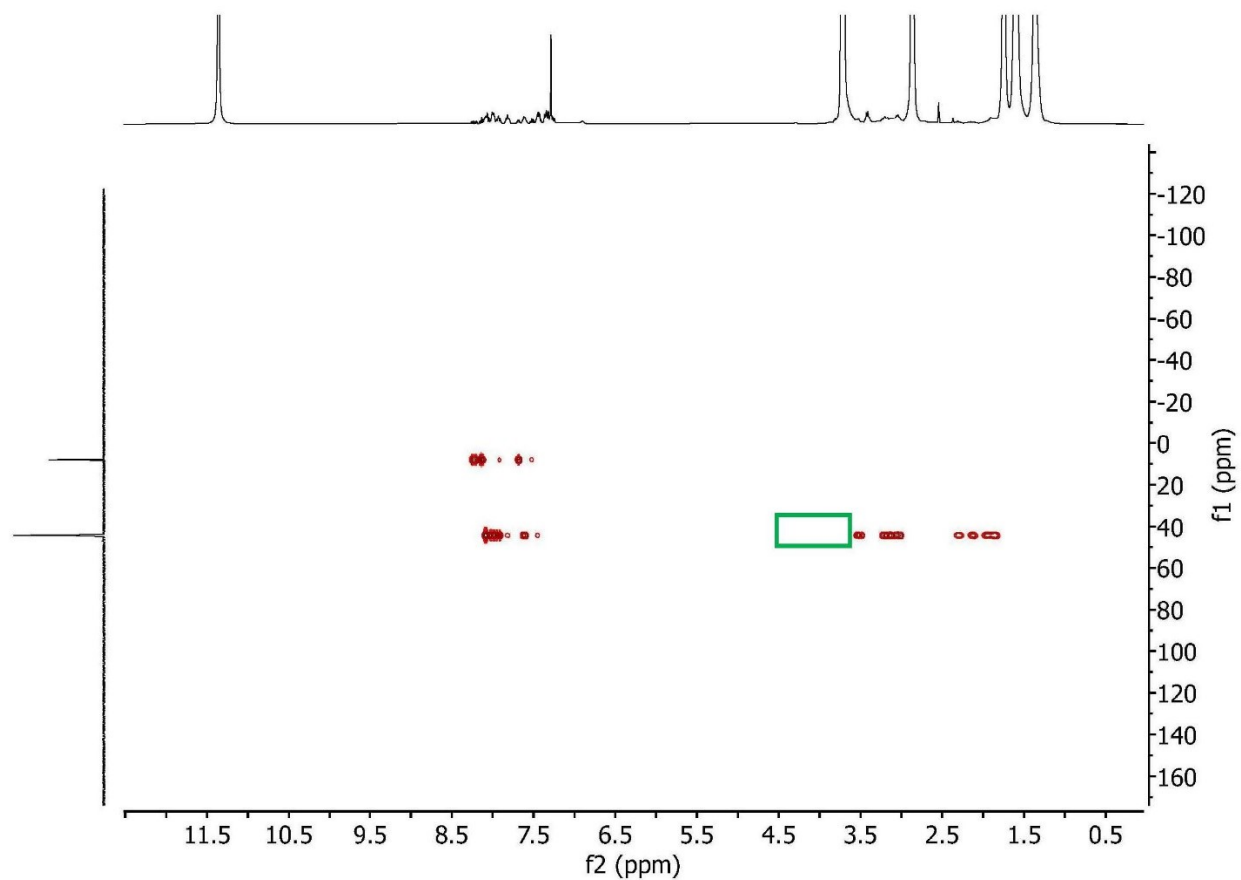

**Figure S8:** Full HMBC spectra of  $^{31}\text{P}$  versus  $^1\text{H}$  for PA66-10F in  $\text{CDCl}_3$ . The box shows where correlations where 2-addition would be anticipated to appear. The lack of any cross peaks demonstrates the DOPO molecule adds to the beta position.



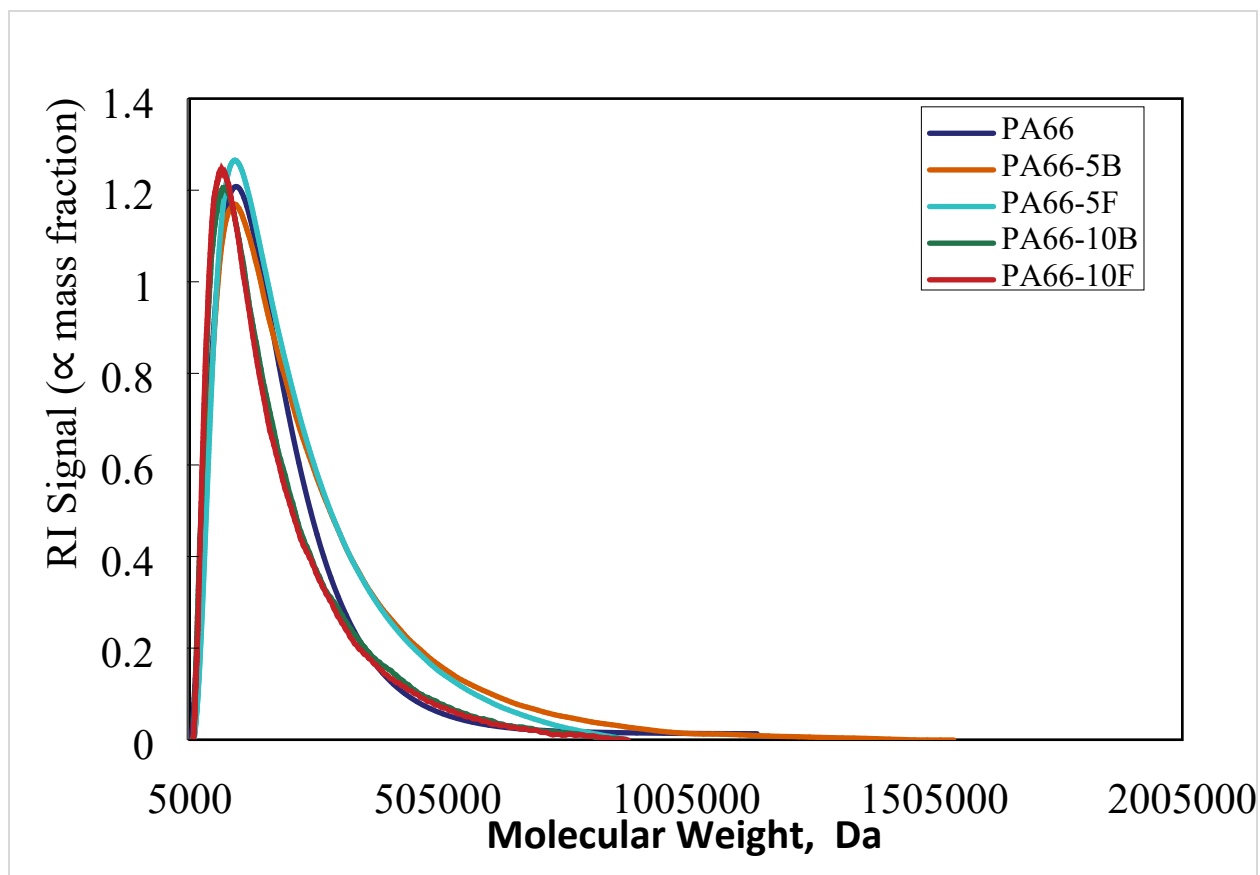

**Figure S9:** GPC chromatograms for the polyamide series, normalized to unit area.

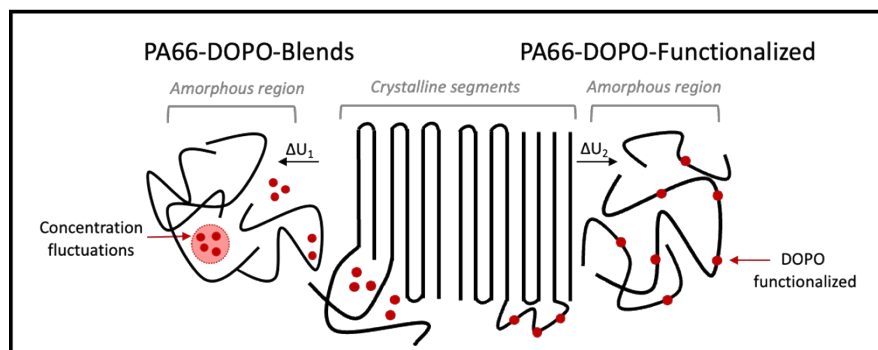

**Figure S10:** Crystal formation in the presence of free and tethered DOPO. Functionalized DOPO attached to the polymer backbone shows higher crystallinity than its blended counterpart.

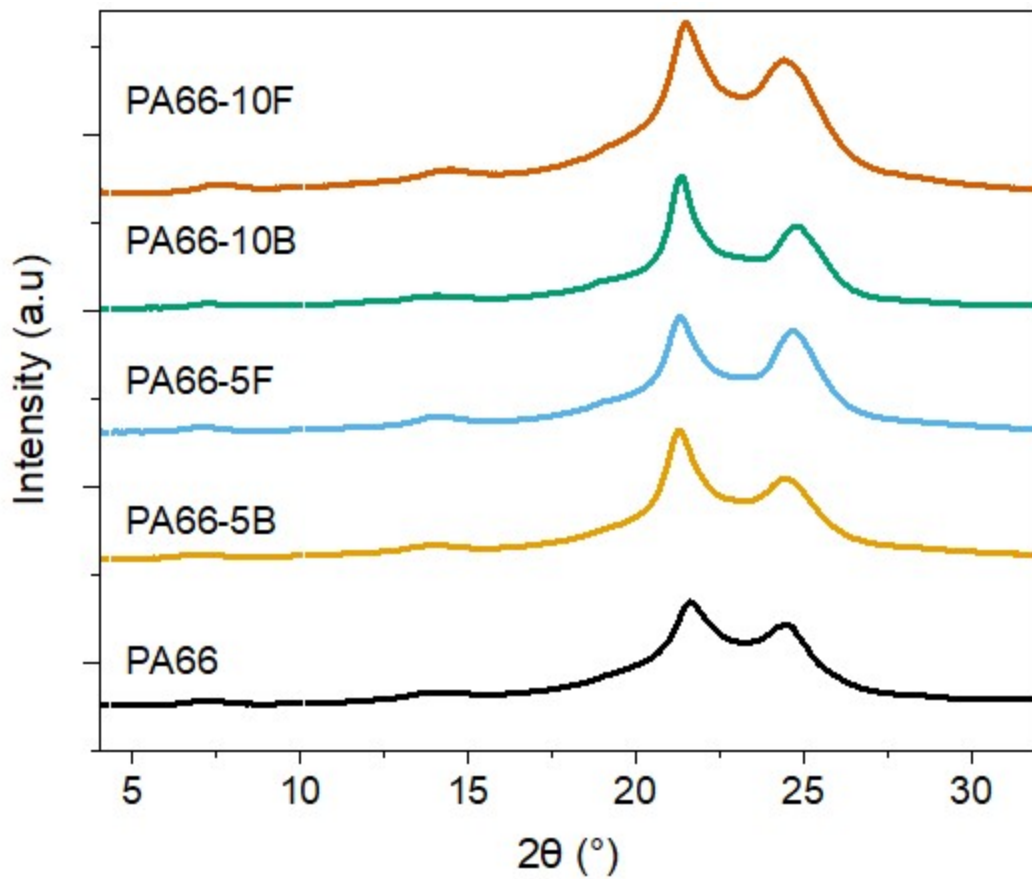

**Figure S11:** WAXS for the flame-retardant polyamide series with respect to PA66 showing room temperature wide-angle X-ray scattering.

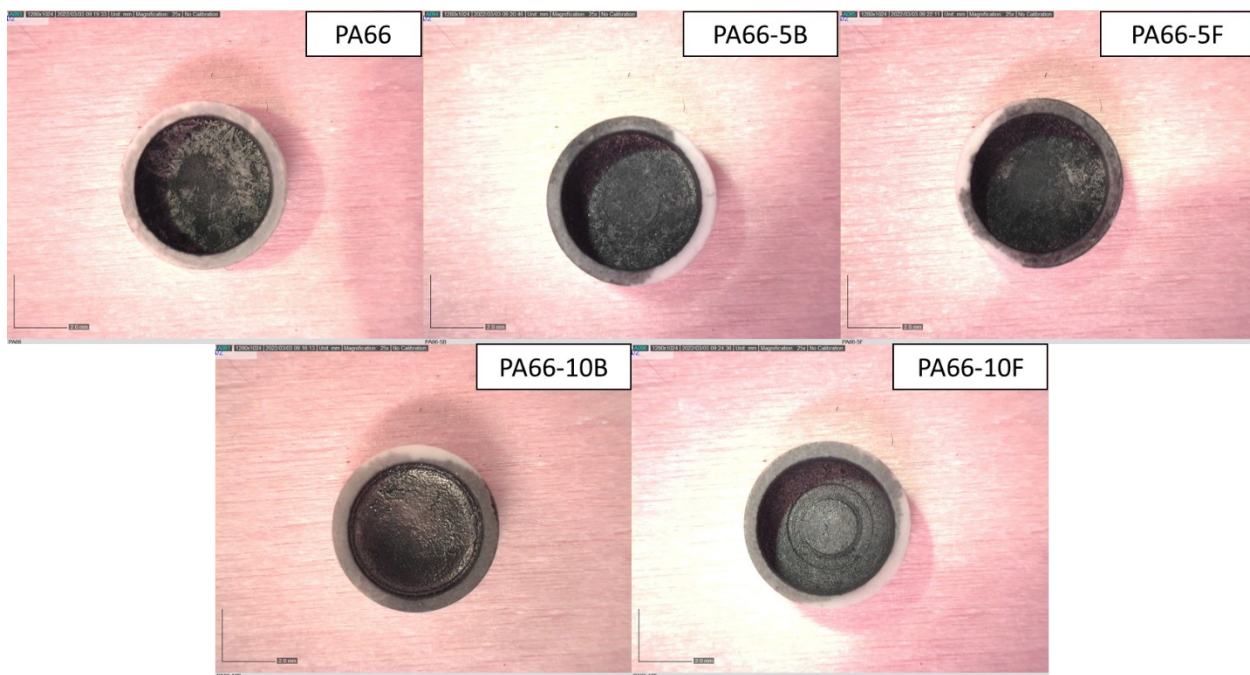

**Figure S12.** Char residues of the samples that underwent MCC. Images suggest that samples flowed before charring and flowed up to the edges of crucibles prior to being fully pyrolyzed.

**Table S1.** Heat release rate (HRR) and other MCC data for polyamides.

| <b>Samples</b> | <b>Char Yield (wt%)</b> | <b>FGC (J/g-k)</b> | <b>HRR Peak (s) (W/g)</b> | <b>HRR Max Temp (°C)</b> | <b>Total HR (kJ/g)</b> |
|----------------|-------------------------|--------------------|---------------------------|--------------------------|------------------------|
| PA66           | 1.45                    | 487                | 560                       | 478                      | 28.0                   |
|                | 1.40                    | 485                | 560                       | 482                      | 28.2                   |
|                | 1.28                    | 487                | 566                       | 480                      | 28.3                   |
| PA66           | 1.10                    | 515                |                           |                          | 29.4                   |
|                | 1.19                    | 521                |                           |                          | 29.2                   |
|                | 1.29                    | 515                |                           |                          | 29.1                   |
| PA66-5B        | 1.74                    | 333                | 374, 237                  | 423, 487                 | 28.0                   |
|                | 1.77                    | 333                | 383, 243                  | 422, 486                 | 28.0                   |
|                | 1.67                    | 326                | 388, 250                  | 424, 490                 | 27.8                   |
| PA66-5F        | 1.63                    | 323                | 329, 228                  | 430, 486                 | 27.4                   |
|                | 1.70                    | 329                | 338, 243                  | 430, 488                 | 28.0                   |
|                | 2.02                    | 323                | 327, 230                  | 427, 485                 | 27.5                   |
| PA66-10B       | 1.55                    | 335                | 315, 220                  | 423, 487                 | 27.7                   |
|                | 1.65                    | 327                | 325, 217                  | 424, 489                 | 27.6                   |
|                | 1.55                    | 324                | 384, 220                  | 419, 490                 | 27.6                   |
|                | 1.50                    | 324                | 371, 223                  | 421, 489                 | 27.9                   |

<sup>a</sup>An additional replicate was run for PA66-10B sample due to the scatter in heat release data
